# Supplementary material for: Bioproduced Proteins On Demand (Bio-POD) in hydrogels using Pichia pastoris
Source: PubMed Central journal article supplement — Bioact Mater. 2021 Jan 27;6(8):2390–9. doi: 10.1016/j.bioactmat.2021.01.019 (PMC7846901; doi:10.1016/j.bioactmat.2021.01.019), 2021-01-27
Supplement: mmc1.pdf [file mmc1.pdf]

## Supplementary Information for

### Bioproduced Proteins On Demand (Bio-POD) in hydrogels using *Pichia pastoris*

Shuo-Fu Yuan<sup>a, d</sup>, Sierra M. Brooks<sup>b, d</sup>, Annalee W. Nguyen<sup>b</sup>, Wen-Ling Lin<sup>a</sup>, Trevor G. Johnston<sup>c</sup>, Jennifer A. Maynard<sup>b</sup>, Alshakim Nelson<sup>c</sup> and Hal S. Alper<sup>a,b,\*</sup>

#### Affiliations:

<sup>a</sup> Institute for Cellular and Molecular Biology, The University of Texas at Austin, Austin, TX,  
USA

<sup>b</sup> McKetta Department of Chemical Engineering, The University of Texas at Austin, Austin, TX,  
USA

<sup>c</sup> Department of Chemistry, University of Washington, Box 351700, Seattle, WA, USA

<sup>d</sup> These authors contributed equally to this work.

\*Correspondence to: Hal Alper, [halper@che.utexas.edu](mailto:halper@che.utexas.edu)

Supplementary Fig. 1

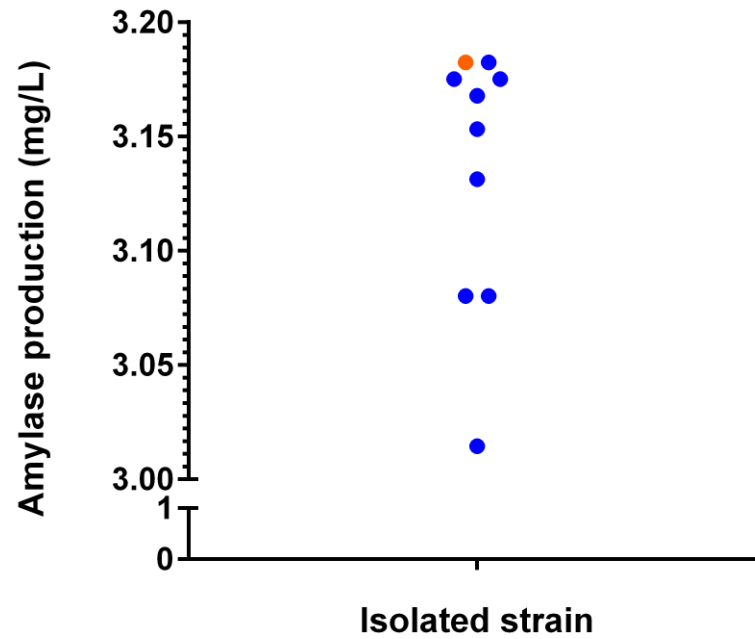

**Generation of  $\alpha$ -amylase-producing *P. pastoris*.** 10 out of 48 zeocin-resistant transformants were cultured in a 96-deep-well microplate and selected based on the cell growth. Secreted  $\alpha$ -amylase capacities were evaluated via starch agar plate (measuring the size of the halos) and plate-based starch-iodine assay. Finally, the highest amylase producer (orange dot) was selected.

Supplementary Fig. 2

(A)

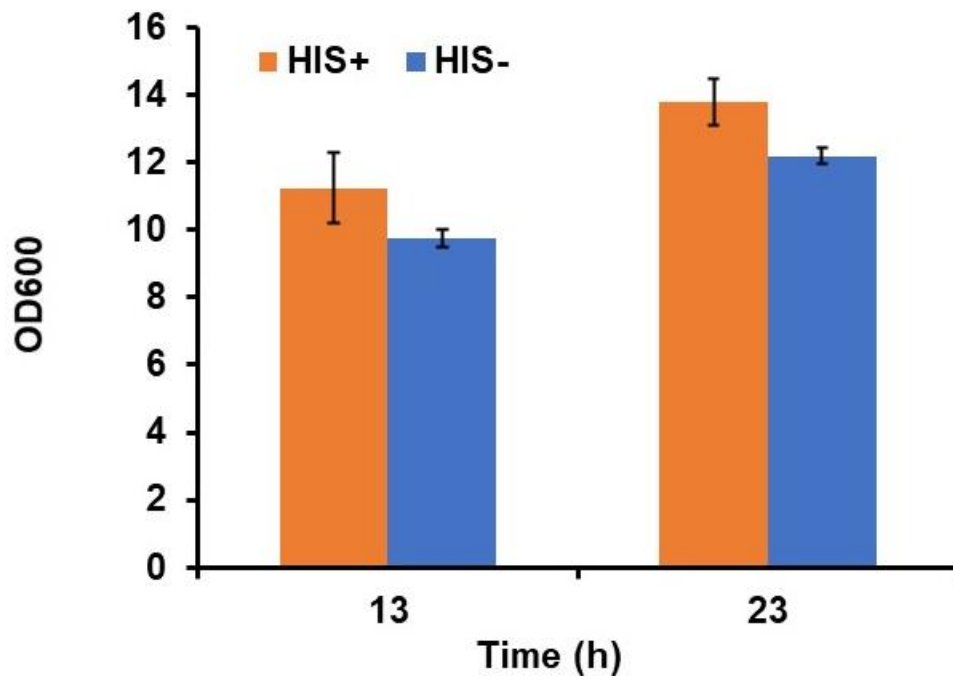

(B)

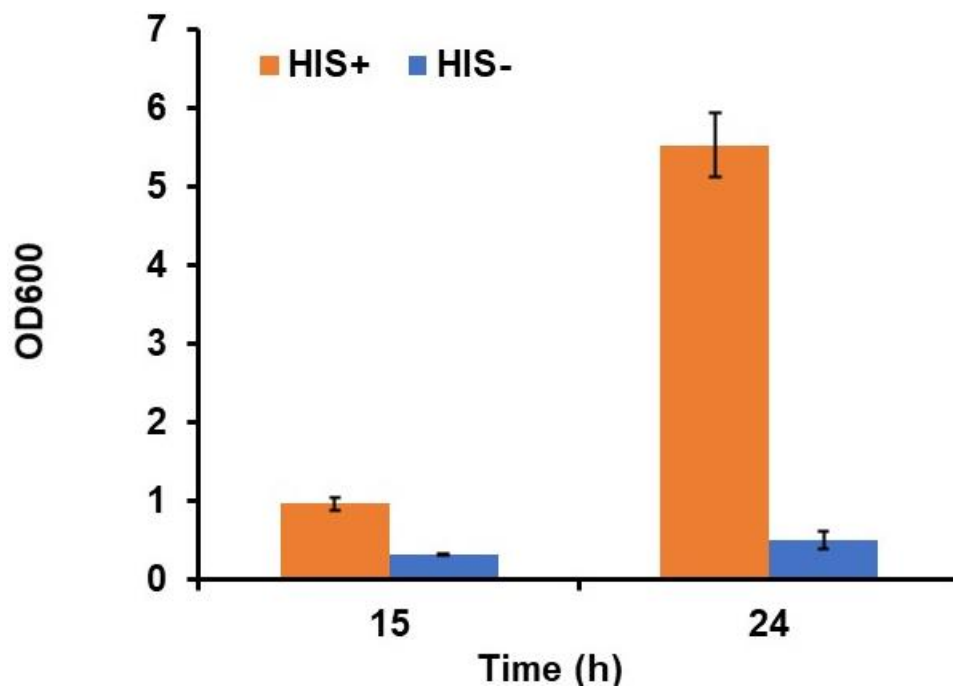

**Comparison of growth between Pp01 (HIS<sup>+</sup>) and wild-type GS115 (HIS<sup>-</sup>).** (A) Growth measurement between Pp01 (HIS<sup>+</sup>; complementation of GS115 the wild-type *HIS4* gene) and wild-type GS115 (HIS<sup>-</sup>) pre-lyophilization. Cells were grown in 3 mL of BMGY medium. (B) Growth measurement between Pp01 (HIS<sup>+</sup>) and wild-type GS115 (HIS<sup>-</sup>) post-lyophilization. Cells were grown in 3 mL of BMMY methanol medium. All cultures were incubated at 30 °C with an orbital speed of 225 rpm. Data are mean  $\pm$  s.d.; n = 3 biological replicates.

Supplementary Fig. 3

(A)

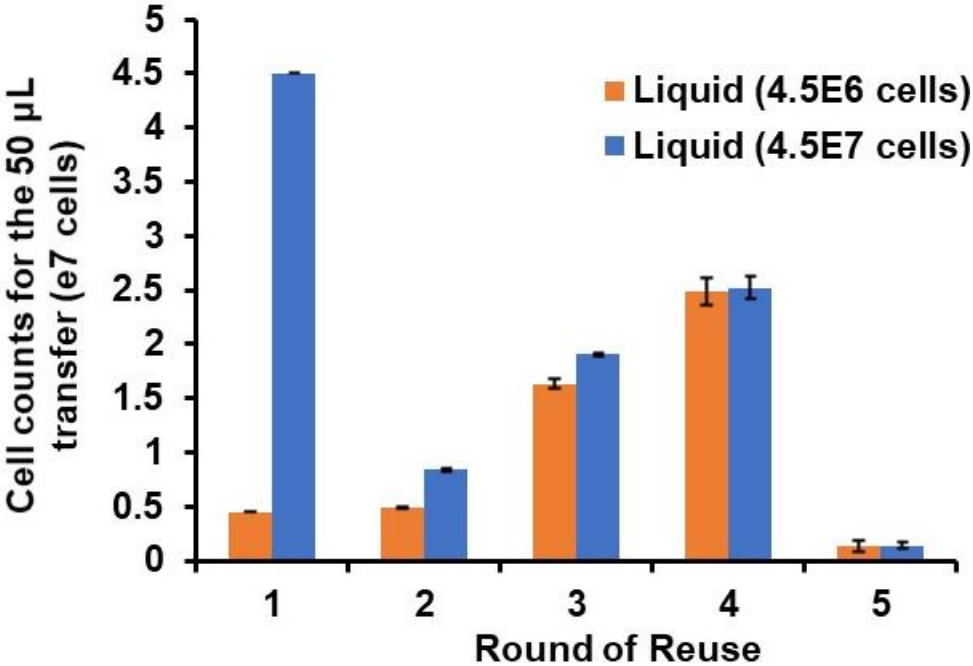

(B)

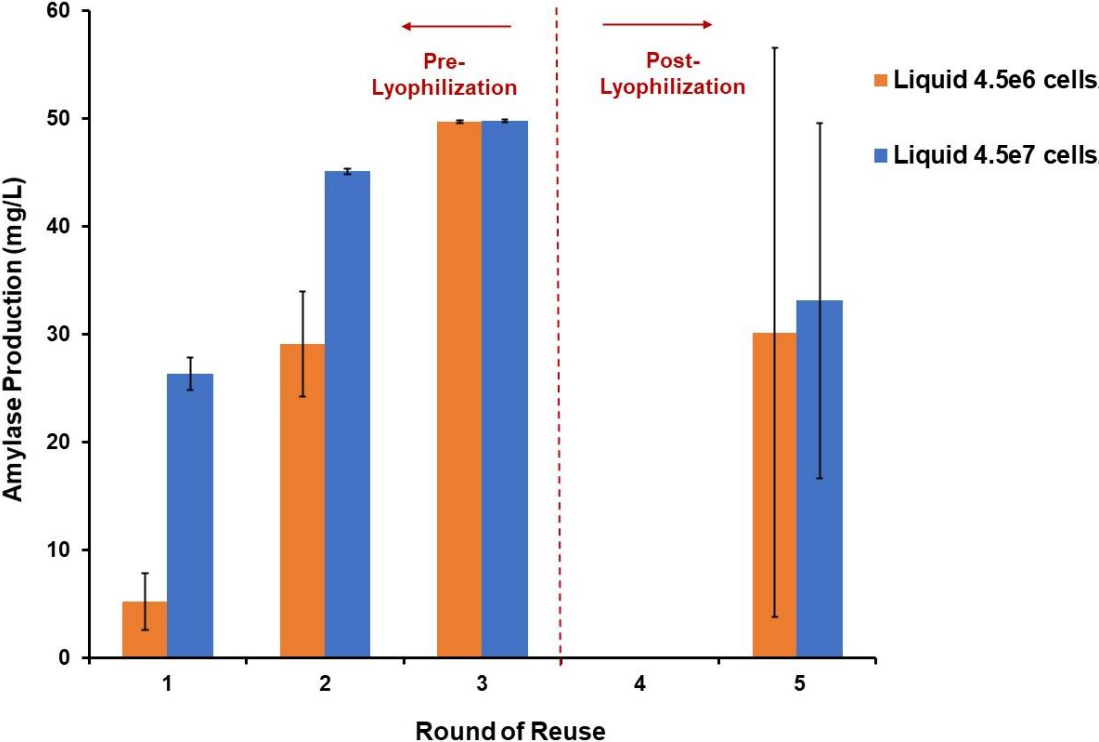

**Comparison of yeast cell numbers and amylase production between the conditions using initial inoculum of  $4.5 \times 10^6$  and  $4.5 \times 10^7$  cells for the liquid culture system.** (A) Yeast cell counts were measured for the 50  $\mu$ L subculture used in each round of the amylase liquid culture re-use experiment. (B) Amylase production for each round of reuse. Culture seeded with the initial number of  $4.5 \times 10^6$  and  $4.5 \times 10^7$  cells were separately grown in 3 mL of BMMY media at 30 °C (round 1). For the following round of reuse, 50  $\mu$ L cultures were taken from the previous batch and transferred to the next batch. The cell numbers in the transfer was calculated by converting OD<sub>600</sub> value to cell numbers (OD<sub>600</sub> of 1 for *P. pastoris* is  $5 \times 10^7$  cells/mL). Each of the reuse took 24 h. Data are mean  $\pm$  s.d.; n = 3 biological replicates.

**Supplementary Table 1. List of strains and plasmids used in this study.**

| Strain/plasmid                       | Description                                                                                                                                                                                         | Source                 |
|--------------------------------------|-----------------------------------------------------------------------------------------------------------------------------------------------------------------------------------------------------|------------------------|
| <b><i>E. coli</i> strain</b>         |                                                                                                                                                                                                     |                        |
| NEB10β                               | $\Delta(ara-leu)$ 7697 <i>araD139 fhuA</i> $\Delta lacX74 galK16 galE15 e14-$ $\phi 80dlacZ\Delta M15$<br><i>recA1 relA1 endA1 nupG rpsL (Str<sup>R</sup>) rph spoT1</i> $\Delta(mrr-hsdRMS-mcrBC)$ | New England<br>Biolabs |
| <b><i>Pichia pastoris</i> strain</b> |                                                                                                                                                                                                     |                        |
| GS115                                | <i>his4</i>                                                                                                                                                                                         | Invitrogen             |
| Pp01                                 | [GS115] <i>his4::pAOX1-HIS4</i> ( <i>his4</i> integration with <i>HIS4</i> marker); control strain for SEAP production study                                                                        | This study             |
| Pp02                                 | [GS115] <i>his4::pAOX1-tSEAP-tAOX1-HIS4</i> ( <i>his4</i> integration with <i>HIS4</i> marker); SEAP-producing strain                                                                               | This study             |
| Pp03                                 | [GS115] <i>AOX1:pAOX1-tAOX1-ZeoR</i> ( <i>AOX1</i> integration with Zeocin resistance gene); control strain for amylase and anti-HER2 production studies                                            | This study             |
| Pp04                                 | [GS115] <i>AOX1:pAOX1-AmyL-tAOX1-ZeoR</i> ( <i>AOX1</i> integration with Zeocin resistance gene); Amylase-producing strain                                                                          | This study             |
| Pp05                                 | [GS115] <i>his4:pAOX1-LC-tAOX1-pAOX1-HC-tAOX1-ZeoR-HIS4</i> ( <i>his4</i> integration                                                                                                               | This study             |

---

with Zeocin resistance gene and *HIS4* marker); anti-HER2-producing strain

---

**Plasmids**

|                      |                                                                                                                   |                          |
|----------------------|-------------------------------------------------------------------------------------------------------------------|--------------------------|
| pPIC9                | For construction of plasmid pPIC9-SEAP                                                                            | Invitrogen               |
| pPICZalphaB-SapL3    | For construction of plasmid pPICZ $\alpha$ -AmyL                                                                  | Addgene (Plasmid #78171) |
| pPICZ $\alpha$       | <i>SapL3</i> gene, C-myc epitope tag and C-terminal polyhistidine (6xHIS) tag were removed from pPICZalphaB-SapL3 | This study               |
| pPICZ-HIS4           | For construction of plasmid pPICZ-LC                                                                              | This study               |
| AbVec-IgG1-hu4D5     | For construction of plasmid pPICZ-HC                                                                              | [1]                      |
| AbVec-hIgK-hu4D5     | For construction of plasmid pPICZ-LC                                                                              | [1]                      |
| pPIC9-SEAP           | For generating a HIS4 integrative cassette employed for SEAP production                                           | This study               |
| pPICZ $\alpha$ -AmyL | For generating an integrative cassette containing Zeocin resistance gene employed for amylase production          | This study               |
| pPICZ-LC             | For construction of plasmid pPICZ_aHER2                                                                           | This study               |
| pPICZ-HC             | For construction of plasmid pPICZ_aHER2                                                                           | This study               |
| pPICZ-aHER2          | For generating an integrative cassette containing full-length of anti-HER2, Zeocin                                | This study               |

---



---

resistance gene and HIS4 marker employed for anti-HER2 production

---

**Supplementary Table 2. List of primers used in this study.**

| <b>ID</b> | <b>Description</b> | <b>Sequence (5'-&gt;3')</b>                                            |
|-----------|--------------------|------------------------------------------------------------------------|
| P1        | tSEAPpPIC9_F       | CTCTCGAGAAAAGAGAGGCTGAAGCT - <u>ATCATCCCAGTTGAGGAGGAGAACC</u>          |
| P2        | tSEAPpPIC9_R       | GAGGAACAGTCATGTCTAAGGCGAATTA - <u>GTCGGTGGTGCCGGC</u>                  |
| P3        | pPIC9SEAP_F        | <u>TAATTCGCCTTAGACATGACTG</u>                                          |
| P4        | pPIC9SEAP_R        | <u>AGCTTCAGCCTCTCTTTTC</u>                                             |
| P5        | pPICalpha_F        | <u>GTTTGTAGCCTTAGACATGACTG</u>                                         |
| P6        | pPICalpha_R        | <u>AGCTTCAGCCTCTCTTTTCTC</u>                                           |
| P7        | pZ_Gib             | ATCTCTCGAGAAAAGAGAGGCTGAAGCT-<br>GTTTGTAGCCTTAGACATGACTGTTTCCT         |
| P8        | AmyL_F             | GGTATCTCTCGAGAAAAGAGAGGCTGAAGCT-<br><u>GCTAATTTGAATGGTACTTTGATG</u>    |
| P9        | AmyL_R             | GAGGAACAGTCATGTCTAAGGCTACAAAC-<br><u>TTATCTTTGAACATAAATAGAAACAGAAC</u> |
| P10       | HIS_F              | GGGACGCTCGAAGGCTTTAATTTGCAAG- <u>CGCTCTCCCTTATGCGACTC</u>              |
| P11       | HIS_R              | CTGGCCTTTTGCTCACATGTTGGTCTCCAG- <u>CGTTCGTTTGTGCAAGCTTATC</u>          |

|     |                 |                                                              |
|-----|-----------------|--------------------------------------------------------------|
| P12 | pZHis_F         | <u>CTGGAGACCAACATGTGAGCAAAAGG</u>                            |
| P13 | pZHis_R         | <u>CTTGCAAATTAAAGCCTTCGAGCGTC</u>                            |
| P14 | Light_F         | GTATCTCTCGAGAAAAGAGAGGCTGAAGCT- <u>GACATCCAGATGACCCAGTC</u>  |
| P15 | Light_R         | GAGGAACAGTCATGTCTAAGGCTACAAAC- <u>ACACTCTCCCCTGTTGAAG</u>    |
| P16 | PICZlight_F     | <u>GTTTGTAGCCTTAGACATGACTG</u>                               |
| P17 | PICZlight_R     | <u>AGCTTCAGCCTCTCTTTTCTC</u>                                 |
| P18 | Heavy_F         | GTATCTCTCGAGAAAAGAGAGGCTGAAGCT- <u>GAAGTGCAGCTGGTGGAAATC</u> |
| P19 | Heavy_R         | GAGGAACAGTCATGTCTAAGGCTACAAAC- <u>TCATTACCCGGGGACAGG</u>     |
| P20 | scrHeavy_R      | <u>GAAGCTATGGTGTGTGGGG</u>                                   |
| P21 | LightHeavy_F    | <u>CCTTCGTTTGTGCGGATCC</u>                                   |
| P22 | EcoRIHeavy_F    | GGAATTC- <u>GATCTAACATCCAAAGACGAAAGGTTG</u>                  |
| P23 | EcoLightHeavy_R | GGAAT- <u>TCTCACTTAATCTTCTGTACTCTGAAGAG</u>                  |

**The underlined sequence indicates that the nucleotides used to be annealed to the template for PCR amplification.**

1 **Supplementary Table 3. gBlock of codon-optimized amylase used in this study.**

---

| <b>Description</b> | <b>Sequence (5'-&gt;3')</b>                                                                                                                                                                                                                                                                                                                                                                                                                                                                                                                                                                                                                                                                                                                                                                                                                                |
|--------------------|------------------------------------------------------------------------------------------------------------------------------------------------------------------------------------------------------------------------------------------------------------------------------------------------------------------------------------------------------------------------------------------------------------------------------------------------------------------------------------------------------------------------------------------------------------------------------------------------------------------------------------------------------------------------------------------------------------------------------------------------------------------------------------------------------------------------------------------------------------|
| CO_amyL            | GCTAATTTGAATGGTACTTTGATGCAGTATTTTCGAGTGGTACATGC<br>CTAACGACGGACAGCACTGGAAGAGATTGCAGAACGACTCCGCC<br>TACTTGGCTGAGCACGGAATTACTGCTGTCTGGATCCCTCCAGCT<br>TACAAGGGAACCTTCTCAGGCTGACGTTGGTTACGGTGCTTACGAC<br>TTGTACGACCTTGGTGAGTTCCACCAAAAAGGTACTGTCCGTACC<br>AAATATGGTACCAAGGGTGAGTTGCAGTCCGCCATTAAGTCCTTG<br>CACTCCAGAGACATCAACGTCTACGGTGACGTTGTCATCAACCAC<br>AAGGGTGGTGCCGATGCCACTGAAGATGTTACTGCTGTCGAGGT<br>CGACCCAGCTGATAGAAACCGTGTCATCTCCGGAGAGCACAGAA<br>TCAAGGCTTGGACCCATTTCCATTTCCCAGGTCGTGGTTCCACCT<br>ACTCCGACTTCAAATGGCACTGGTACCACTTCGATGGTACCGACT<br>GGGACGAGTCCAGAAAATTGAACCGTATTTACAAGTTCCAAGGT<br>AAAGCCTGGGACTGGGAGGTTTCCAATGAGAACGGTAATTATGAT<br>TACTTGATGTACGCTGACATTGACTACGATCACCCAGATGTCGCT<br>GCTGAGATCAAGAGATGGGGTACCTGGTACGCCAACGAGCTTCA<br>GTTGGACGGTTTCCGTTTGGACGCCGTCAAGCACATCAAATTTTC<br>TTTCTTGAGAGACTGGGTCAACCACGTCAGAGAAAAGACCGGTA |

---

---

AGGAGATGTTACCGTCGCCGAGTACTGGCAGAACGATCTTGGT  
GCTTTGGAAAAC TATTTGAACAAGACTAACTTTAACCATTTCTGTT  
TTCGACGTTCCACTTCACTACCAGTTTCATGCCGCCTCTACCCAG  
GGTGGTGGTTACGACATGAGAAAGTTGTTGAACTCCACCGTTGT  
CTCCAAGCACCCCTCTTAAGGCCGTTACCTTTGTCGACAATCACGA  
CACCCAGCCTGGTCAATCCTTGGAGTCCACTGTTTCAGACTTGGTT  
CAAGCCATTGGCTTACGCCTTTATTTTGACTAGAGAGTCCGGATA  
CCCACAGGTTTTCTACGGTGACATGTACGGTACCAAAGGAGACTC  
CCAAAGAGAGATTCCTGCTTTGAAGCATAAGATCGAACCTATTTT  
GAAGGCTCGTAAACAGTACGCCTACGGAGCTCAGCACGACTACT  
TCGATCACACGATATCGTCCGTTGGACTAGAGAGGGAGACTCTT  
CTGTCGCCAACTCTGGTTTGGCCGCTTTGATTACTGATGGTCCAG  
GAGGTGCCAAGAGAATGTACGTCGGACGTCAGAACGCTGGTGAG  
ACCTGGCACGACATTACCGGTAACAGATCCGAGCCAGTCGTTATC  
AACTCCGAGGGATGGGGTGAGTTCCATGTTAACGGTGGTTCTGTT  
TCTATTTATGTTCAAAGATAA

---

#### 4 **Reference**

- 5 [1] A. W. Nguyen, K. C. Le, J. A. Maynard, Identification of high affinity HER2 binding  
6 antibodies using CHO Fab surface display, *Protein Engineering, Design and Selection*. 31  
7 (2018) 91-101. <http://dx.doi.org/10.1093/protein/gzy004>.
